# Supplementary material for: Imputation-Based Fine-Mapping Suggests That Most QTL in an Outbred Chicken Advanced Intercross Body Weight Line Are Due to Multiple, Linked Loci
Source: PubMed Central journal article supplement (PMC5217102; doi:10.1534/g3.116.036012), 2016-10-31
Supplement: 119TableS1.pdf [file 119TableS1.pdf]

**Table S1.** Statistically suggestive independent signals within each QTL identified as nominally significant ( $p < 0.05$ ) in the forward-selection procedure. For each QTL, Model 1 was first fitted for all markers and the most significant marker was selected and added as a covariate before refitting model 1 again. This procedure, selecting the most significant marker as a covariate and refitting Model 1, was repeated until no markers within the QTL reached the nominal significance threshold. QTL that were selected at 20% FDR in the following backward-elimination procedure (Table 2 in main manuscript) are highlighted in bold italics.

| GGA <sup>a</sup> | QTL <sup>b</sup> | Position <sup>c</sup><br>(bp) | Marker <sup>d</sup>  | $a \pm SE^e$       | Sign <sup>f</sup>                       | $p_{HWS}^g$ | $p_{LWS}^h$ | MAF <sup>i</sup><br>$F_2-F_8$ |
|------------------|------------------|-------------------------------|----------------------|--------------------|-----------------------------------------|-------------|-------------|-------------------------------|
| 1                | Growth1          | <b>173 709 608</b>            | <b>rs14916997</b>    | <b>-36.6 ± 5.5</b> | <b><math>3.6 \times 10^{-11}</math></b> | <b>0.11</b> | <b>0.82</b> | <b>0.48</b>                   |
|                  |                  | 179 613 655                   | rs313927704          | 41.6 ± 12.2        | $6.5 \times 10^{-4}$                    | 0.30        | 0.04        | 0.05                          |
|                  |                  | <b>170 637 618</b>            | <b>rs13968052</b>    | <b>19.1 ± 6.6</b>  | <b><math>3.8 \times 10^{-3}</math></b>  | <b>0.35</b> | <b>0.07</b> | <b>0.21</b>                   |
|                  |                  | 176 383 356                   | rs13975251           | 19.7 ± 7.7         | $1.1 \times 10^{-2}$                    | 0.43        | 0.09        | 0.12                          |
|                  |                  | 178 029 363                   | rs317567034          | -31.6 ± 11.6       | $6.4 \times 10^{-3}$                    | 0.20        | 0.02        | 0.05                          |
|                  |                  | 179 806 129                   | rs314200699          | 28.8 ± 12.2        | $1.8 \times 10^{-2}$                    | 0.04        | 0.14        | 0.05                          |
|                  |                  | 169 810 898                   | rs15487296           | 161.7 ± 78.5       | $4.0 \times 10^{-2}$                    | 0.00        | 0.34        | 0.00                          |
| 2                | Growth2          | 64 317 336                    | rs14194723           | -101.5 ± 15.9      | $1.5 \times 10^{-10}$                   | 0.04        | 0.04        | 0.03                          |
|                  |                  | 62 837 662                    | rs14192893           | 458.6 ± 138.1      | $9.0 \times 10^{-4}$                    | 0.02        | 0.00        | 0.00                          |
|                  |                  | 59 778 572                    | rs316345242          | -28.7 ± 9.2        | $1.8 \times 10^{-3}$                    | 0.20        | 0.02        | 0.09                          |
|                  |                  | <b>56 720 515</b>             | <b>rs14185295</b>    | <b>15.3 ± 5.5</b>  | <b><math>5.2 \times 10^{-3}</math></b>  | <b>0.46</b> | <b>0.14</b> | <b>0.39</b>                   |
|                  |                  | 54 865 875                    | rs14183473           | 57.4 ± 20.3        | $4.7 \times 10^{-3}$                    | 0.00        | 0.30        | 0.02                          |
|                  |                  | <b>57 198 629</b>             | <b>rs14185836</b>    | <b>-14.1 ± 5.4</b> | <b><math>9.7 \times 10^{-3}</math></b>  | <b>0.41</b> | <b>0.25</b> | <b>0.39</b>                   |
|                  |                  | <b>65 460 002</b>             | <b>rs14196021</b>    | <b>14.4 ± 6.0</b>  | <b><math>1.7 \times 10^{-2}</math></b>  | <b>0.43</b> | <b>0.11</b> | <b>0.25</b>                   |
| 2                | Growth3          | 55 330 630                    | rs15100427           | 13.7 ± 6.4         | $3.2 \times 10^{-2}$                    | 0.37        | 0.34        | 0.21                          |
|                  |                  | 62 639 245                    | rs15107150           | -74.8 ± 36.2       | $3.9 \times 10^{-2}$                    | 0.11        | 0.00        | 0.00                          |
|                  |                  | 130 133 780                   | rs14248248           | 20.2 ± 6.5         | $1.9 \times 10^{-3}$                    | 0.07        | 0.57        | 0.21                          |
| 2                | Growth3          | 130 592 117                   | rs16133110           | -62.2 ± 25.4       | $1.4 \times 10^{-2}$                    | 0.00        | 0.11        | 0.01                          |
|                  |                  | <b>126 000 254</b>            | <b>rs16120360</b>    | <b>13.8 ± 6.1</b>  | <b><math>2.3 \times 10^{-2}</math></b>  | <b>0.54</b> | <b>0.18</b> | <b>0.28</b>                   |
| 3                | Growth4          | <b>37 287 334</b>             | <b>rs316425755</b>   | <b>-32.6 ± 6.4</b> | <b><math>2.9 \times 10^{-7}</math></b>  | <b>0.26</b> | <b>0.38</b> | <b>0.23</b>                   |
|                  |                  | <b>26 215 175</b>             | <b>rs14328509</b>    | <b>-21.8 ± 5.4</b> | <b><math>5.1 \times 10^{-5}</math></b>  | <b>0.26</b> | <b>0.79</b> | <b>0.45</b>                   |
|                  |                  | 28 981 759                    | rs313368484          | 92.5 ± 24.7        | $1.8 \times 10^{-4}$                    | 0.02        | 0.16        | 0.01                          |
|                  |                  | 36 103 180                    | rs13723817           | 26.3 ± 6.8         | $1.0 \times 10^{-4}$                    | 0.02        | 0.55        | 0.18                          |
|                  |                  | <b>57 624 596</b>             | <b>rs14363139</b>    | <b>-18.0 ± 5.2</b> | <b><math>5.7 \times 10^{-4}</math></b>  | <b>0.13</b> | <b>0.77</b> | <b>0.50</b>                   |
|                  |                  | 61 227 711                    | rs16284878           | -34.6 ± 11.0       | $1.6 \times 10^{-3}$                    | 0.59        | 0.09        | 0.06                          |
|                  |                  | <b>47 729 342</b>             | <b>rs316384373</b>   | <b>21.9 ± 6.9</b>  | <b><math>1.6 \times 10^{-3}</math></b>  | <b>0.04</b> | <b>0.34</b> | <b>0.16</b>                   |
|                  |                  | 53 589 855                    | rs14359071           | 34.7 ± 11.9        | $3.5 \times 10^{-3}$                    | 0.37        | 0.27        | 0.05                          |
|                  |                  | 60 099 912                    | rs14364587           | -33.2 ± 11.2       | $3.0 \times 10^{-3}$                    | 0.57        | 0.00        | 0.06                          |
|                  |                  | <b>39 139 081</b>             | <b>rs15468467</b>    | <b>-16.6 ± 6.4</b> | <b><math>9.2 \times 10^{-3}</math></b>  | <b>0.15</b> | <b>0.38</b> | <b>0.21</b>                   |
|                  |                  | <b>33 743 569</b>             | <b>rs314044798</b>   | <b>15.6 ± 5.0</b>  | <b><math>1.9 \times 10^{-3}</math></b>  | <b>0.09</b> | <b>0.55</b> | <b>0.38</b>                   |
|                  |                  | 40 789 962                    | rs16256006           | -53.8 ± 20.0       | $7.2 \times 10^{-3}$                    | 0.04        | 0.00        | 0.01                          |
|                  |                  | 38 049 506                    | rs14341458           | 72.7 ± 26.2        | $5.6 \times 10^{-3}$                    | 0.09        | 0.00        | 0.01                          |
|                  |                  | 36 036 392                    | rs14339632           | 29.3 ± 10.7        | $6.1 \times 10^{-3}$                    | 0.00        | 0.11        | 0.05                          |
|                  |                  | 53 236 895                    | rs13570951           | -17.9 ± 7.1        | $1.2 \times 10^{-2}$                    | 0.52        | 0.05        | 0.10                          |
|                  |                  | 49 677 389                    | rs15350215           | 55.0 ± 21.0        | $8.9 \times 10^{-3}$                    | 0.17        | 0.00        | 0.01                          |
|                  |                  | 24 558 483                    | rs14326932           | -180.3 ± 75.5      | $1.7 \times 10^{-2}$                    | 0.00        | 0.20        | 0.00                          |
| 52 685 153       | rs13570803       | 14.0 ± 5.8                    | $1.7 \times 10^{-2}$ | 0.33               | 0.68                                    | 0.20        |             |                               |
| 61 496 004       | rs315203852      | 24.7 ± 10.3                   | $1.6 \times 10^{-2}$ | 0.57               | 0.00                                    | 0.06        |             |                               |
| 25 074 560       | rs14327473       | 41.5 ± 19.5                   | $3.3 \times 10^{-2}$ | 0.22               | 0.11                                    | 0.02        |             |                               |
| 50 259 236       | rs14356142       | -46.7 ± 22.5                  | $3.8 \times 10^{-2}$ | 0.00               | 0.16                                    | 0.01        |             |                               |
| 4                | Growth6          | <b>13 511 203</b>             | <b>rs15500313</b>    | <b>25.4 ± 5.5</b>  | <b><math>3.3 \times 10^{-6}</math></b>  | <b>0.91</b> | <b>0.13</b> | <b>0.46</b>                   |
|                  |                  | <b>10 914 312</b>             | <b>rs14428120</b>    | <b>17.3 ± 5.3</b>  | <b><math>1.1 \times 10^{-3}</math></b>  | <b>0.07</b> | <b>0.84</b> | <b>0.43</b>                   |

|    |          |                   |                    |                    |                               |             |             |             |
|----|----------|-------------------|--------------------|--------------------|-------------------------------|-------------|-------------|-------------|
|    |          | <b>2 392 397</b>  | <b>rs14419462</b>  | <b>23.4 ± 8.1</b>  | <b>3.8 × 10<sup>-3</sup></b>  | <b>0.35</b> | <b>0.05</b> | <b>0.13</b> |
|    |          | 1 379 849         | rs314301286        | -42.3 ± 13.3       | 1.5 × 10 <sup>-3</sup>        | 0.04        | 0.07        | 0.04        |
|    |          | 3 589 044         | rs10732133         | -36.6 ± 11.1       | 9.4 × 10 <sup>-4</sup>        | 0.28        | 0.04        | 0.06        |
|    |          | 4 908 910         | rs14422558         | -151.2 ± 55.9      | 6.9 × 10 <sup>-3</sup>        | 0.00        | 0.11        | 0.00        |
|    |          | 11 693 052        | rs314301286        | 37.0 ± 14.8        | 1.3 × 10 <sup>-2</sup>        | 0.07        | 0.18        | 0.03        |
|    |          | 11 345 880        | rs14428501         | -22.5 ± 9.2        | 1.4 × 10 <sup>-2</sup>        | 0.02        | 0.34        | 0.09        |
|    |          | 2 850 506         | rs14420072         | 49.5 ± 22.0        | 2.5 × 10 <sup>-2</sup>        | 0.00        | 0.09        | 0.01        |
| 4  | Growth7  | <b>88 325 118</b> | <b>rs15639000</b>  | <b>-21.0 ± 5.4</b> | <b>9.9 × 10<sup>-5</sup></b>  | <b>0.46</b> | <b>0.52</b> | <b>0.47</b> |
|    |          | <b>86 755 267</b> | <b>rs14499758</b>  | <b>-28.0 ± 6.3</b> | <b>7.9 × 10<sup>-6</sup></b>  | <b>0.11</b> | <b>0.43</b> | <b>0.26</b> |
|    |          | 87 755 983        | rs318052788        | 21.0 ± 8.9         | 1.8 × 10 <sup>-2</sup>        | 0.04        | 0.18        | 0.09        |
|    |          |                   |                    | -286.6 ± 138.1     |                               |             |             |             |
| 5  | Growth8  | <b>36 291 277</b> | <b>rs13585490</b>  | <b>-32.9 ± 5.3</b> | <b>4.5 × 10<sup>-10</sup></b> | <b>0.39</b> | <b>0.54</b> | <b>0.40</b> |
|    |          | <b>38 774 986</b> | <b>rs315605733</b> | <b>-29.6 ± 6.5</b> | <b>5.8 × 10<sup>-6</sup></b>  | <b>0.04</b> | <b>0.27</b> | <b>0.19</b> |
|    |          | <b>35 299 978</b> | <b>rs16487933</b>  | <b>-19.9 ± 6.2</b> | <b>1.2 × 10<sup>-3</sup></b>  | <b>0.65</b> | <b>0.25</b> | <b>0.24</b> |
|    |          | 36 426 195        | rs15697504         | -49.3 ± 16.0       | 2.0 × 10 <sup>-3</sup>        | 0.22        | 0.46        | 0.03        |
|    |          | <b>38 867 279</b> | <b>rs314075508</b> | <b>-12.6 ± 4.9</b> | <b>1.1 × 10<sup>-2</sup></b>  | <b>0.09</b> | <b>0.46</b> | <b>0.48</b> |
|    |          | 36 575 445        | rs16489220         | -43.4 ± 17.5       | 1.3 × 10 <sup>-2</sup>        | 0.15        | 0.48        | 0.02        |
|    |          | <b>34 772 650</b> | <b>rs16487762</b>  | <b>14.0 ± 7.0</b>  | <b>4.6 × 10<sup>-2</sup></b>  | <b>0.67</b> | <b>0.14</b> | <b>0.17</b> |
|    |          | <b>33 713 055</b> | <b>rs14530756</b>  | <b>11.5 ± 5.3</b>  | <b>3.2 × 10<sup>-2</sup></b>  | <b>0.22</b> | <b>0.68</b> | <b>0.35</b> |
| 7  | Growth9  | <b>23 959 214</b> | <b>rs16596357</b>  | <b>-38.9 ± 5.4</b> | <b>7.1 × 10<sup>-13</sup></b> | <b>0.33</b> | <b>0.50</b> | <b>0.34</b> |
|    |          | 26 021 398        | rs14618036         | 80.8 ± 22.6        | 3.6 × 10 <sup>-4</sup>        | 0.11        | 0.00        | 0.01        |
|    |          | <b>18 544 622</b> | <b>rs14611566</b>  | <b>18.3 ± 5.3</b>  | <b>5.8 × 10<sup>-4</sup></b>  | <b>0.50</b> | <b>0.50</b> | <b>0.46</b> |
|    |          | 33 699 148        | rs16610251         | 67.0 ± 23.0        | 3.5 × 10 <sup>-3</sup>        | 0.24        | 0.04        | 0.01        |
|    |          | <b>32 262 733</b> | <b>rs317586448</b> | <b>-15.1 ± 5.2</b> | <b>3.4 × 10<sup>-3</sup></b>  | <b>0.74</b> | <b>0.41</b> | <b>0.44</b> |
|    |          | 27 518 867        | rs14619679         | 32.7 ± 12.1        | 6.8 × 10 <sup>-3</sup>        | 0.09        | 0.09        | 0.05        |
|    |          | <b>29 631 963</b> | <b>rs10727581</b>  | <b>17.2 ± 6.2</b>  | <b>5.4 × 10<sup>-3</sup></b>  | <b>0.39</b> | <b>0.07</b> | <b>0.22</b> |
|    |          | 29 999 307        | rs14622731         | -30.3 ± 10.6       | 4.3 × 10 <sup>-3</sup>        | 0.26        | 0.00        | 0.06        |
|    |          | 23 134 876        | rs312633887        | -30.8 ± 12.0       | 1.0 × 10 <sup>-2</sup>        | 0.41        | 0.18        | 0.05        |
|    |          | 35 390 789        | rs317022486        | -25.2 ± 10.0       | 1.2 × 10 <sup>-2</sup>        | 0.15        | 0.30        | 0.07        |
|    |          | 14 071 039        | rs16088281         | 34.6 ± 15.8        | 2.9 × 10 <sup>-2</sup>        | 0.02        | 0.09        | 0.03        |
|    |          | 25 726 731        | rs317769956        | -22.5 ± 9.0        | 1.2 × 10 <sup>-2</sup>        | 0.00        | 0.34        | 0.09        |
|    |          | 24 549 929        | rs14616465         | -101.8 ± 50.3      | 4.3 × 10 <sup>-2</sup>        | 0.00        | 0.11        | 0.00        |
| 20 | Growth12 | <b>10 667 729</b> | <b>rs16172598</b>  | <b>26.3 ± 5.4</b>  | <b>1.1 × 10<sup>-6</sup></b>  | <b>0.67</b> | <b>0.11</b> | <b>0.33</b> |
|    |          | 10 965 403        | rs16173231         | 346.1 ± 139.1      | 1.3 × 10 <sup>-2</sup>        | 0.04        | 0.00        | 0.00        |
|    |          | 8 814 245         | rs314843162        | 21.9 ± 8.8         | 1.3 × 10 <sup>-2</sup>        | 0.24        | 0.11        | 0.09        |
|    |          | <b>13 427 530</b> | <b>rs16176151</b>  | <b>-13.9 ± 5.2</b> | <b>7.0 × 10<sup>-3</sup></b>  | <b>0.35</b> | <b>0.48</b> | <b>0.48</b> |
|    |          | 7 881 700         | rs312541071        | -73.1 ± 29.7       | 1.4 × 10 <sup>-2</sup>        | 0.20        | 0.07        | 0.01        |
|    |          | 11 389 861        | rs13634923         | 19.2 ± 8.3         | 2.1 × 10 <sup>-2</sup>        | 0.24        | 0.20        | 0.11        |
|    |          | <b>10 165 171</b> | <b>rs14278292</b>  | <b>-12.7 ± 5.8</b> | <b>2.9 × 10<sup>-2</sup></b>  | <b>0.50</b> | <b>0.13</b> | <b>0.26</b> |
|    |          | <b>9 302 754</b>  | <b>rs14277526</b>  | <b>14.1 ± 6.1</b>  | <b>2.0 × 10<sup>-2</sup></b>  | <b>0.39</b> | <b>0.05</b> | <b>0.23</b> |

<sup>a</sup>Gallus Gallus Autosome; <sup>b</sup>QTL name as in (Jacobsson et al. 2005); <sup>c</sup>Base pair position according to *Chicken* genome assembly (galGal3) of May 2006; <sup>d</sup>SNP name as in NCBI dbSNP; <sup>e</sup>Additive effect ± Standard Error calculated within each QTL as described in model 1; <sup>f</sup>Significance of the estimated additive genetic effect from fitting model 1 where the allelicoding is based on the major/minor allele-frequencies and not the line origin of the alleles as in Table 2; <sup>g</sup>Frequency of the allele corresponding to the estimated effect, calculated from all founder birds which originates from the high-weight selection line; <sup>h</sup>Frequency of the allele corresponding to the estimated effect, calculated from all founder birds which originates from the low-weight selection line; <sup>i</sup>Minor allele frequency calculated from all 1348 birds, AIL generation F<sub>2</sub>-F<sub>8</sub>, included in the study.
